# Supplementary material for: Asymmetric hetero-assembly of colloidal nanoparticles through “crash reaction” in a centrifugal field
Source: Royal Society of Chemistry journal article supplement (doi:10.1039/c3dt53556h), 2014-01-01
Supplement: c3dt53556h1.pdf [file c3dt53556h1.pdf]

# Supporting Information for

## Asymmetric Hetero-assembly of Colloidal Nanoparticles through “Crash Reaction” in a Centrifugal Field

Sha Song,<sup>a</sup> Yun Kuang,<sup>a</sup> Liang Luo,<sup>a</sup> and Xiaoming Sun<sup>\*a</sup>

<sup>a</sup> State Key Laboratory of Chemical Resource Engineering, P.O. Box 98, Beijing University of Chemical Technology, Beijing 100029, P. R. China

\* Corresponding to sunxm@mail.buct.edu.cn

### Experimental Details

**Materials:** All the chemicals were A. R. grade, bought from Beijing Chemical Reagent Co., Inc., and used as received without further purification.

#### 1. Synthesis of Au NPs

Gold nanoparticles were synthesized in two steps by seed-mediated method using cetyltrimethylammonium chloride (CTAC) as surfactant.

##### Preparation of Au Seeds

Seed solution was prepared by vigorous mixing of 10 ml of HAuCl<sub>4</sub> ( $2.5 \times 10^{-4}$ M) aqueous CTAC (0.1 M) solution with 0.4 ml NaBH<sub>4</sub> (0.02 M).

##### Preparation of the growth solution

The growth solution was prepared by adding 10 ml of HAuCl<sub>4</sub> (10 mM), 400  $\mu$ l of NaBr (0.01 M) and 4 ml of ascorbic acid (0.1 M) to 400 ml of aqueous CTAC (0.1 M) solution.

##### The growth of Au NPs

The seed solution was aged for 60 minutes and diluted 10 times before adding it to the growth solution. To this colorless growth solution, depending on the size of particles required, 60  $\mu$ l and 2mL of diluted seed solution was added under vigorous agitation and left undisturbed one week.

##### Functionalization of gold nanoparticles

For surface modification, the Au NPs were firstly centrifuged and concentrated by 10 times, then 10 $\mu$ l p-ATP (100 $\mu$ M) and 5 $\mu$ l MPA (100 $\mu$ M) were added in 1ml of 50nm and 20 nm Au NP solution,

respectively. Then 0.43ml of EG was added to 20 nm Au NP solution.

## **2. Crash reaction in the tube**

### **(1) Density gradient preparation**

All separation experiments were performed using a Beckman Optima L-100XP ultracentrifuge. Typically the separation layer step gradient was made using 40%, 50%, 60%, 70%, and 80% (by volume) solutions of Ethylene glycol (EG) in water. For instance, a volume ratio of EG: H<sub>2</sub>O = 6:4 was used to make the 60% solution. A step gradient was created directly in Beckman centrifuge tubes (polyallomer) by adding layers to the tube with decreasing density (i.e., lower EG concentration). To make a (40% + 50% + 60% + 70% + 80%) gradient, 1.8 mL of 80% solutions of EG in H<sub>2</sub>O was first added to the centrifuge tube, then 1.8 mL 70% solutions of EG in H<sub>2</sub>O was slowly layered above the 80% layer. The subsequent layers were made following the same procedure and resulted in a density gradient along the centrifuge tube.

### **(2) Asymmetric hetero-assembly of colloidal nanoparticles in a centrifugal field**

Highly concentrated 60nm Au nanoparticle solution was put on top of the gradient and 20 nm NPs were in 30% ethylene glycol (EG) solution layer. A buffer layer was placed between two Au NP layers to prevent spontaneously assembly of the NPs with opposite charges. Then the tubes were centrifuged at 10,000 rpm for 10 minutes (a photograph of the ultracentrifuge tube after separation is shown in Fig. 2A). Fractions (200 μL each) were obtained by orderly manual extraction along the centrifuge tube after ultracentrifugation.

### **(3) Asymmetric hetero-assembly of colloidal nanoparticles in a centrifugal field by introducing a water/oil interface**

Only 40% EG solution was replaced by 35% CCl<sub>4</sub> in cyclohexane, others remain unchanged.

## **3. Characterization of nanocrystals**

Transmission electron microscopy (TEM): A transmission electron microscope (Hitachi H-800, operated at 200 kV) was used to evaluate Au NPs size and morphology. Fractions obtained by gradient separation were directly dried on carbon film supported on copper grids. The optical properties of samples were characterized by UV-vis absorbance spectroscopy (UV-2501PC,

Shimadzu, working in the range 300 – 1100 nm).

## Calculations

### 1. Calculation of sedimentation rate

Particle density ( $\rho_p$ ) depends on both the sizes( $r$ ) and the hydration layer thickness ( $t$ ). For the big Au nanoparticles, TEM shows that  $r$  is about 30 nm,. The hydration layer thickness ( $t$ ) can be assumed to be about 3nm (double layer of CTAC molecule) . The density ( $\rho_p$ ) of the Au nanoparticle is given by formula:

$$\rho_p = \frac{\rho_{Au}V_{Au} + \rho_{H_2O}(V_p - V_{Au})}{V_p} \quad (I)$$

where  $V_p$  denotes the volume of the particle and  $V_{Au}$  is the volume of the Au particle without its hydration layer. The density of Au ( $\rho_{Au}$ ) and the hydration layer ( $\rho_{H_2O}$ ) are  $19.32 \times 10^3 \text{ kg/m}^3$  and  $1 \times 10^3 \text{ kg/m}^3$ , respectively.

According to the classical sedimentation theory, the sedimentation velocity of spherical colloidal particles in a given medium with density  $\rho_m$  and viscosity  $\eta_s$ , in a centripetal field of  $g'$ , can be described as:

$$v = 2(\rho_p - \rho_m)r^2g'/(9\eta_s) \quad (II)$$

where  $r$  denotes the radius of the Au nanoparticle coated with a solvation shell several nanometers thick. The density ( $\rho_m$ ) of 30% ethylene glycol (EG) is  $1.035 \times 10^3 \text{ kg/m}^3$  and the viscosity ( $\eta_s$ ) of 30% EG is  $2.089 \times 10^{-3} \text{ Pa}\cdot\text{s}$ . We centrifuged at 10,000 rpm, so the centripetal force field of  $g'$  is equivalent to an acceleration of  $1.7147 \times 10^5 \text{ m/s}^2$ . Then the sedimentation rates could be calculated to  $267 \mu\text{m/s}$  and  $25 \mu\text{m/s}$  for 60nm and 20nm Au NPs, respectively.

### 2. Calculation of diffusion constant

According to Stokes-Einstein equation, diffusion constant  $D$  of spherical nanoparticles could be calculated by:

$$D = k_B T / (6\pi r \eta_s) \quad (III)$$

Where  $k_B$  is  $1.38 \times 10^{-23} \text{ J/K}$ , the absolute temperature  $T$  is 298k, the viscosity ( $\eta_m$ ) of 30% EG is  $2.089 \times 10^{-3} \text{ Pa}\cdot\text{s}$ . Then diffusion constant  $D$  of 60nm Au nanoparticles is calculated to be  $3.39 \mu\text{m}^2/\text{s}$ .

### 3. Calculation of collision possibility

Particle concentration of original 20nm Au nanoparticle solution was about 1nM. Then, for 200 $\mu$ l of 10 times concentrated solution, the total amount of NP is about  $1.2 \times 10^{12}$ . For mathematical modeling, we divide the nanoparticle solution into several monolayers and each layer has a thickness equals the diameter to Au NP, which is 20nm. When the 200 $\mu$ l solution was suspended in a centrifugal tube with diameter of 14mm, the total layer number ( $N_l$ ) is  $6.5 \times 10^4$  and each layer contains  $1.85 \times 10^7$  ( $N_p$ ) nanoparticles.

Since the sedimentation velocity of 50nm NPs was 267 $\mu$ m/s, they would stayed in one monolayer for  $7.5 \times 10^{-5}$ s, thus the horizontal Brown motion distance was 15.9nm. In order to simplify the mathematical model, we could assume an NP with diameter equals to 81.8nm that collide with 20nm Au NPs and therefore the Brown motion of big NPs could be neglected. Also, we assume a uniform distribution of small NPs and thus their Brown motion could be offset.

Only when big nanoparticle appeared in the circle area with radius less than 91.8nm from the center of 20nm NPs, the collision could happen, thus the probability could be calculated by quotient value between total possible collisions area and the total area of one monolayer. The total possible collisions area could be calculated by:

$$A_c = N_p * \pi (r_{20} + d_{91.8})^2 = 1.85 \times 10^7 \times \pi \times (10\text{nm} + 91.8\text{nm})^2 \quad (\text{IV})$$

The total area of one monolayer could be calculated by

$$A_t = \pi r_{\text{tube}}^2 = \pi \times 7\text{mm}^2 \quad (\text{V})$$

Therefore, the collision probability in one monolayer is:

$$P_1 = A_c / A_t \times 100\% = 0.38\% \quad (\text{VI})$$

And the total collision probability is:

$$P = 1 - (1 - P_1)^{N_l} = 1 - (1 - 0.38\%)^{65000} \approx 100\% \quad (\text{VII})$$

### Supplementary Figures

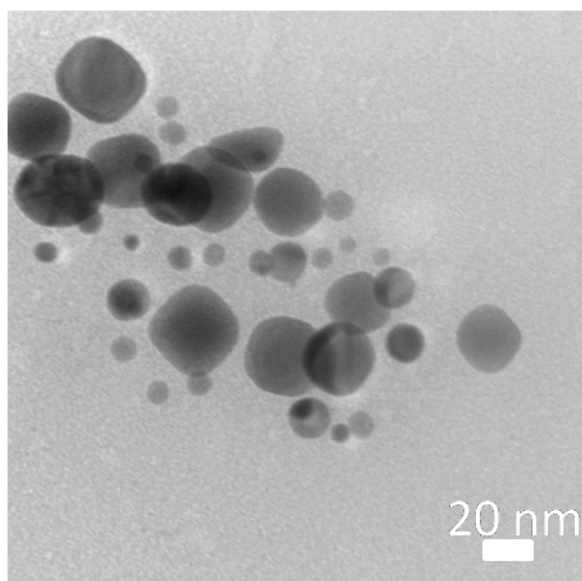

**Fig. S1** TEM image of the NPs with opposite charges were mixed without EDC catalysts.

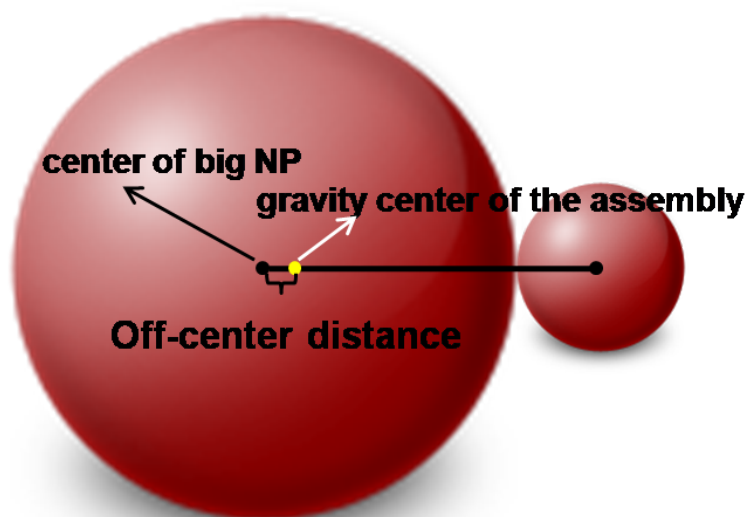

**Fig. S2** Schematic illustration of the off-center distance

| TEM                                                                                 | Off-center Distance(nm) | Number of Assembled NPs | Percentage ( % ) |
|-------------------------------------------------------------------------------------|-------------------------|-------------------------|------------------|
|    | 0                       | 2                       | 1                |
|    | 1.43                    | 79                      | 53               |
|    | 2.39                    | 5                       | 3                |
|    | 2.49                    | 2                       | 1                |
|    | 2.68                    | 32                      | 21               |
|    | 3.45                    | 10                      | 7                |
|  | 3.53                    | 10                      | 7                |
|  | 4.4                     | 7                       | 5                |
|  | 5                       | 3                       | 2                |

**Fig. S3** Statistical data of off-center distances (from gravity center to the center of big nanoparticle) of the assemblies obtained from “crash reaction”.

| TEM                                                                                 | Off-center Distance(nm) | Number of Assembled NPs | Percentage (%) |
|-------------------------------------------------------------------------------------|-------------------------|-------------------------|----------------|
|    | 1.43                    | 13                      | 10.8           |
|    | 2.68                    | 10                      | 8.3            |
|    | 0                       | 44                      | 36.7           |
|    | 3.53                    | 14                      | 11.7           |
|    | 1.3                     | 17                      | 14.1           |
|   | 2.39                    | 3                       | 2.5            |
|  | 2.5                     | 5                       | 4.2            |
|  | 2.14                    | 3                       | 2.5            |
|  | 1.21                    | 9                       | 7.5            |
|  | 4.4                     | 2                       | 1.7            |

**Fig. S4** Statistical data of off-center distances (from gravity center to the center of big nanoparticle) of the assemblies obtained from random assembly.

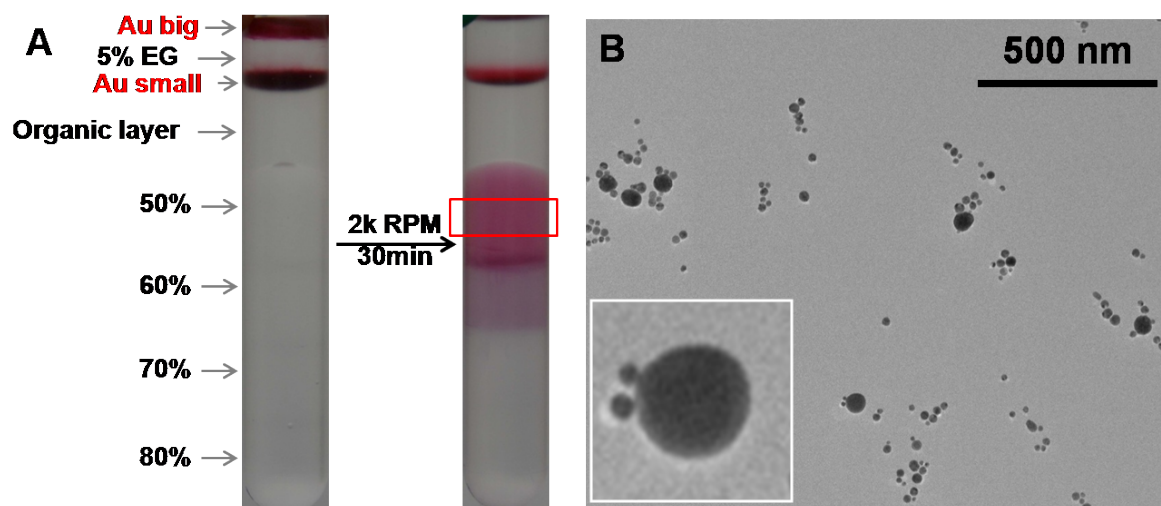

**Fig. S5** Schematic illustration of “crash reaction” (A) on water/oil interfaces. (B) TEM image of assembled superstructures passed through water/oil interfaces.
